# Supplementary material
Source: Elsevier journal article supplement (https://www.sciencedirect.com/science/article/pii/S188558571730364X)
Supplement: mmc1 [file mmc1.pdf]

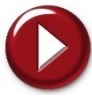

## Material suplementario

### Aortitis torácica por *Salmonella enteritidis*

#### Tabla del material suplementario

Casos publicados de aortitis causada por *Salmonella sp.*

| Caso | Referencia                         | Edad (años)/sexo | Localización | Cultivo               | Tratamiento antibiótico <sup>a</sup>  | Resultado |
|------|------------------------------------|------------------|--------------|-----------------------|---------------------------------------|-----------|
| 1    | Berchtold et al. <sup>1</sup>      | 60/V             | AA           | <i>S. enteritidis</i> | OFL + CFX (5 semanas), CIP (2 meses)  | Sano      |
| 2    | Stoica et al. <sup>2</sup>         | 78/M             | AT           | <i>S. enteritidis</i> | N/A (6 meses)                         | Sano      |
| 3    | Kotzampassakis et al. <sup>3</sup> | 84/M             | AT           | <i>S. enteritidis</i> | Quinolona (6 semanas)                 | Sano      |
| 4    | Ting et al. <sup>4</sup>           | 59/V             | AT×2         | <i>S. enteritidis</i> | CTX (5 semanas), LEV (larga duración) | Sano      |
| 5    | Koeppel et al. <sup>5</sup>        | 47/V             | AA           | <i>S. enteritidis</i> | IMI + MET (1 mes), CIP (6 meses)      | Sano      |
| 6    | Kam et al. <sup>6</sup>            | 53/V             | AA           | <i>S. enteritidis</i> | CTX (5 semanas), TMP (larga duración) | Sano      |
| 7    | Kritpracha et al. <sup>7</sup>     | 58/V             | AA           | <i>Salmonella sp.</i> | CIP (larga duración)                  | Sano      |
| 8    | Kritpracha et al. <sup>7</sup>     | 68/V             | AA           | <i>Salmonella sp.</i> | CIP (larga duración)                  | Sano      |
| 9    | Kritpracha et al. <sup>7</sup>     | 59/V             | AA           | <i>Salmonella sp.</i> | CIP (larga duración)                  | Sano      |
| 10   | Kritpracha et al. <sup>7</sup>     | 42/V             | AA           | <i>Salmonella sp.</i> | TMP (larga duración)                  | Sano      |
| 11   | Kritpracha et al. <sup>7</sup>     | 79/V             | AT           | <i>Salmonella sp.</i> | CIP (larga duración)                  | Sano      |
| 12   | Kritpracha et al. <sup>7</sup>     | 63/V             | AA           | <i>Salmonella sp.</i> | CIP (1 mes)                           | Fallecido |
| 13   | Kritpracha et al. <sup>7</sup>     | 60/V             | N/A          | <i>Salmonella sp.</i> | N/A                                   | Sano      |
| 14   | Kritpracha et al. <sup>7</sup>     | 50/V             | N/A          | <i>Salmonella sp.</i> | TMP (larga duración)                  | Sano      |
| 15   | Kan et al. <sup>8</sup>            | 75/V             | AA           | <i>Salmonella sp.</i> | IV (4 semanas), VO (larga duración)   | Sano      |
| 16   | Kan et al. <sup>8</sup>            | 66/M             | AT           | <i>Salmonella sp.</i> | IV (4 semanas), VO (larga duración)   | Sano      |
| 17   | Kan et al. <sup>8</sup>            | 81/V             | AA           | <i>Salmonella sp.</i> | IV (4 semanas), VO (larga duración)   | Sano      |
| 18   | Kan et al. <sup>8</sup>            | 57/V             | AA           | <i>Salmonella sp.</i> | IV (4 semanas), VO (larga duración)   | Sano      |
| 19   | Kan et al. <sup>8</sup>            | 81/M             | AAT          | <i>Salmonella sp.</i> | IV (4 semanas), VO (larga duración)   | Sano      |
| 20   | Kan et al. <sup>8</sup>            | 76/V             | AA           | <i>Salmonella sp.</i> | IV (4 semanas), VO (larga duración)   | Sano      |
| 21   | Kan et al. <sup>8</sup>            | 61/V             | AAT          | <i>Salmonella sp.</i> | IV (4 semanas), VO (larga duración)   | Sano      |
| 22   | Kan et al. <sup>8</sup>            | 65/V             | AA           | <i>Salmonella sp.</i> | IV (4 semanas), VO (larga duración)   | Sano      |
| 23   | Kan et al. <sup>8</sup>            | 83/V             | AA           | <i>Salmonella sp.</i> | IV (4 semanas), VO (larga duración)   | Sano      |
| 24   | Lao et al. <sup>9</sup>            | 74/V             | AT           | <i>Salmonella sp.</i> | CTX (2 meses), TMP (larga             | Sano      |

|    |                                 |      |    |                       | duración)                                   |           |
|----|---------------------------------|------|----|-----------------------|---------------------------------------------|-----------|
| 25 | Strahm et al. <sup>10</sup>     | 67/V | AA | <i>S. enteritidis</i> | CTX + CIP (1mes), CIP (12 meses)            | Fallecido |
| 26 | Pulimamidi et al. <sup>11</sup> | 86/M | AT | <i>S. enteritidis</i> | CTX (1 semana), LEV (larga duración)        | Sano      |
| 27 | Pulimamidi et al. <sup>11</sup> | 81/M | AT | <i>S. enteritidis</i> | CTX (4 semanas) + LEV (3 semanas)           | Fallecido |
| 28 | Parekh et al. <sup>12</sup>     | 77/V | AA | <i>Salmonella sp.</i> | N/A                                         | Sano      |
| 29 | Talwar et al. <sup>13</sup>     | 75/V | AA | <i>S. enteritidis</i> | CTX + AZT (2 meses), AZT (larga duración)   | Sano      |
| 30 | Galán Ros et al. <sup>b</sup>   | 70/M | AT | <i>S. enteritidis</i> | CTX + CIP (4 semanas), CIP (larga duración) | Sano      |

AA: aorta abdominal; AAT: aorta toracoabdominal; AT: aorta torácica; AZT: azitromicina;  
 CFX: cefuroxima; CIP: ciprofloxacino; CTX: ceftriaxona; IMI: imipenem; IV: intravenoso;  
 LEV: levofloxacino; M: mujer; MET: metronidazol; N/A: sin respuesta; OFL: ofloxacino;  
 TMP: trimetoprima-sulfametoxazol; V: varón; VO: vía oral.

<sup>a</sup>Duración del tratamiento antibiótico. Larga duración: tratamiento prolongado o de por vida. Del paciente 15 al 23, no hay datos acerca del tipo de terapia antibiótica.

<sup>b</sup>Datos del trabajo actual.

## BIBLIOGRAFÍA

1. Berchtold C, Eibl C, Seelig MH, Jakob P, Schönleben K. Endovascular treatment and complete regression of an infected abdominal aortic aneurysm. *J Endovasc Ther.* 2002;9:543-548.
2. Stoica L, Chocron S, Falcoz PE, Etievent JP. Endovascular stent grafting for contained rupture of the descending thoracic aorta. *Eur J Cardiothorac Surg.* 2003;23:1068-1070.
3. Kotzampassakis N, Delanaye P, Masy F, Creemers E. Endovascular stent-graft for thoracic aorta aneurysm caused by Salmonella. *Eur J Cardiothorac Surg.* 2004;26:225-227.
4. Ting AC, Cheng SW, Ho P, Poon JT. Endovascular repair for multiple Salmonella mycotic aneurysms of the thoracic aorta presenting with cardiovascular syndrome. *Eur J Cardiothorac Surg.* 2004;26:221-224.
5. Koeppel TA, Gahlen J, Diehl S, Probst RL, Dueber C. Mycotic aneurysm of the abdominal aorta with retroperitoneal abscess: successful endovascular repair. *J Vasc Surg.* 2004;40:164-166.
6. Kam MH, Toh LK, Tan SG, Wong D, Chia KH. A case report of endovascular stenting in Salmonella mycotic aneurysm: a successful procedure in an immunocompromised patient. *Ann Acad Med Singapore.* 2007;36:1028-1031.
7. Kritpracha B, Premprabha D, Sungsi J, Tantarattanapong W, Rookkapan S, Juntarapatin P. Endovascular therapy for infected aortic aneurysms. *J Vasc Surg.* 2011;54:1259-1265.
8. Kan CD, Yen HT, Kan CB, Yang YJ. The feasibility of endovascular aortic repair strategy in treating infected aortic aneurysms. *J Vasc Surg.* 2012;55:55-60.
9. Lao WF, Huang CH, Lin CH, Lu MJ, Hung CR. Endovascular stent graft repair for a Salmonella-infected aneurysm of thoracic aorta. *Ann Vasc Surg.* 2012;26:731.e5-e8.
10. Strahm C, Lederer H, Schwarz EI, Bachli EB. Salmonella aortitis treated with endovascular aortic repair: a case report. *J Med Case Rep.* 2012;6:243.

11. Pulimamidi S, Caputo FJ, Fraimow HS, Nahra R, Tsigrelis C. Salmonella aortitis treated with endovascular aortic repair. *Ann Vasc Surg.* 2014;28:1314.e5-e10.
12. Parekh PJ, Shams R, Challapallisri V, Marik PE. Successful treatment of Salmonella aortitis with endovascular aortic repair and antibiotic therapy. *BMJ Case Rep.* 2014. Disponible en: <http://dx.doi.org/10.1136/bcr-2014-204525>.
13. Talwar A, George N, Tharian B, Roberts-Thomson J. An immunosuppressed man with an aortic rupture secondary to Salmonella aortitis successfully treated with endovascular aortic repair. *Ann Vasc Surg.* 2015;29:839.e5-e8.
